# Supplementary material for: The relationship between working memory updating components and reading comprehension
Source: PubMed Central journal article supplement (PMC10110648; doi:10.1007/s10339-023-01127-3), 2023-02-11
Supplement: 10339_2023_1127_MOESM1_ESM.pdf [file 10339_2023_1127_MOESM1_ESM.pdf]

Cognitive Processing

**The relationship between working memory updating components and  
reading comprehension**

Rocío Linares and Santiago Pelegrina

Department of Psychology, University of Jaén, Spain

**Author Note**

Correspondence should be addressed to Rocío Linares, Universidad de Jaén, Paraje Las  
Lagunillas s/n, 23071 Jaén (Spain), Email: [rlinares@ujaen.es](mailto:rlinares@ujaen.es)

## Supplementary Table S1

*Model fit statistics for response times and accuracy*

|          | Model | Fixed effects                                                            | AIC    | BIC    | logLik  | df |
|----------|-------|--------------------------------------------------------------------------|--------|--------|---------|----|
| Time     | 1     | Retr                                                                     | 12592  | 12611  | -6292.1 | 4  |
|          | 2     | Retr + Subst                                                             | 12594  | 12617  | -6292.1 | 5  |
|          | 3     | Retr + Subst + Retr x Subst                                              | 12581  | 12609  | -6284.5 | 6  |
|          | 4     | Retr + Subst + Retr x Subst + Ct                                         | 12559  | 12591  | -6272.5 | 7  |
|          | 5     | Retr + Subst + Retr x Subst + Ct + Fm                                    | 12514  | 12551  | -6248.9 | 8  |
|          | 6     | Retr + Subst + Retr x Subst + Ct + Fm + Rf                               | 12514  | 12556  | -6248.0 | 9  |
|          | 7     | Retr + Subst + Retr x Subst + Ct + Fm + Voc                              | 12515  | 12556  | -6248.5 | 9  |
|          | 8     | Retr + Subst + Retr x Subst + Ct + Fm + Ra                               | 12515  | 12557  | -6248.7 | 9  |
|          | 9     | RC + Retr + Subst + Retr x Subst + Retr x RC + Ct + Fm                   | 12515  | 12561  | -6247.4 | 10 |
|          | 10    | RC + Retr + Subst + Retr x Subst + Subs x RC + Ct + Fm                   | 12517  | 12563  | -6248.5 | 10 |
|          | 11    | RC + Retr + Subst + Retr x Subst + Retr x Subs x RC + Ct + Fm            | 12517  | 12572  | -6246.6 | 12 |
| Accuracy | 1     | Retr                                                                     | 5683.8 | 5702.3 | -2837.9 | 4  |
|          | 2     | Retr + Subst                                                             | 5639.3 | 5662.4 | -2814.7 | 5  |
|          | 3     | Retr + Subst + Retr x Subst                                              | 5551.1 | 5578.1 | -2769.6 | 6  |
|          | 4     | Retr + Subst + Retr x Subst + Ct                                         | 5518.4 | 5550.6 | -2752.2 | 7  |
|          | 5     | Retr + Subst + Retr x Subst + Ct + Fm                                    | 5514.8 | 5551.6 | -2749.4 | 8  |
|          | 6     | Retr + Subst + Retr x Subst + Ct + Fm + Rf                               | 5516.7 | 5558.2 | -2749.3 | 9  |
|          | 7     | Retr + Subst + Retr x Subst + Ct + Fm + Voc                              | 5512.0 | 5553.5 | -2747.0 | 9  |
|          | 8     | Retr + Subst + Retr x Subst + Ct + Fm + Voc + Ra                         | 5512.9 | 5558.9 | -2746.4 | 10 |
|          | 9     | RC + Retr + Subst + Retr x Subst + Retr x RC + Ct + Fm + Voc             | 5495.5 | 5546.2 | -2736.8 | 11 |
|          | 10    | RC + Retr + Subst + Retr x Subst + Subs x RC + Ct + Fm + Voc             | 5496.0 | 5551.3 | -2736.0 | 12 |
|          | 11    | RC + Retr + Subst + Retr x Subst + Retr x Subs x RC + Ct + Fm + Voc + Ra | 5496.0 | 5555.9 | -2735.0 | 13 |

## Supplementary Table S2

*Results of model comparisons for response times and accuracy*

|          | Model                | $\chi^2$ | <i>df</i> | <i>p</i> |
|----------|----------------------|----------|-----------|----------|
| Time     | Model 1 vs. Model 2  | 0.04     | 1         | .833     |
|          | Model 1 vs. Model 3  | 15.22    | 2         | < .001   |
|          | Model 3 vs. Model 4  | 24.00    | 1         | < .001   |
|          | Model 4 vs. Model 5  | 47.34    | 1         | < .001   |
|          | Model 5 vs. Model 6  | 1.68     | 1         | .194     |
|          | Model 5 vs. Model 7  | 0.72     | 1         | .395     |
|          | Model 5 vs. Model 8  | 0.32     | 1         | .567     |
|          | Model 5 vs. Model 9  | 2.89     | 2         | .235     |
|          | Model 5 vs. Model 10 | 0.75     | 2         | .685     |
|          | Model 5 vs. Model 11 | 4.52     | 4         | .340     |
| Accuracy | Model 1 vs. Model 2  | 46.49    | 1         | < .001   |
|          | Model 1 vs. Model 3  | 90.20    | 1         | < .001   |
|          | Model 3 vs. Model 4  | 34.76    | 1         | < .001   |
|          | Model 4 vs. Model 5  | 5.59     | 1         | .018     |
|          | Model 4 vs. Model 6  | 0.07     | 1         | .784     |
|          | Model 6 vs. Model 7  | 4.78     | 1         | .028     |
|          | Model 7 vs. Model 8  | 1.11     | 1         | .291     |
|          | Model 7 vs. Model 9  | 20.46    | 2         | < .001   |
|          | Model 9 vs. Model 10 | 1.50     | 1         | .219     |
|          | Model 9 vs. Model 11 | 3.5      | 2         | .173     |
